# Supplementary material for: Meat–Egg–Dairy Consumption and Frailty among Chinese Older Adults: Exploring Rural/Urban and Gender Differences
Source: MDPI journal article supplement (doi:10.3390/nu16091334), 2024-04-28
Supplement: s1 [file s1]

**Table S1.** Scoring Criteria for Frailty.

| Variables                                  | Cut-Off Point                                                                             |
|--------------------------------------------|-------------------------------------------------------------------------------------------|
| 1. Self-reported health                    | V. good = 0, good = 0.25; okay = 0.5, bad = 0.75, very bad = 1                            |
| 2. Bathing                                 | Without assistance = 0, one part assistance = 0.5, more than one part assistance = 1      |
| 3. Dressing                                | Without assistance = 0, one part assistance = 0.5, more than one part assistance = 1      |
| 4. Toileting                               | Without assistance = 0, one part assistance = 0.5, more than one part assistance = 1      |
| 5. Transferring                            | Without assistance = 0, one part assistance = 0.5, more than one part assistance = 1      |
| 6. Continence                              | Without assistance = 0, one part assistance = 0.5, more than one part assistance = 1      |
| 7. Feeding                                 | Without assistance = 0, one part assistance = 0.5, more than one part assistance = 1      |
| 8. Hypertension                            | Yes = 1, no = 0                                                                           |
| 9. Diabetes                                | Yes = 1, no = 0                                                                           |
| 10. Heart disease                          | Yes = 1, no = 0                                                                           |
| 11. Stroke or CVD                          | Yes = 1, no = 0                                                                           |
| 12. Bronchitis et al                       | Yes = 1, no = 0                                                                           |
| 13. Tuberculosis                           | Yes = 1, no = 0                                                                           |
| 14. Cataract                               | Yes = 1, no = 0                                                                           |
| 15. Glaucoma                               | Yes = 1, no = 0                                                                           |
| 16. Gastric or Duodenal ulcer              | Yes = 1, no = 0                                                                           |
| 17. Arthritis                              | Yes = 1, no = 0                                                                           |
| 18. Cholecystitis                          | Yes = 1, no = 0                                                                           |
| 19. Blood Disease                          | Yes = 1, no = 0                                                                           |
| 20. Nephritis                              | Yes = 1, no = 0                                                                           |
| 21. Visual function                        | Can see and distinguish (1) = 0, can see only (2) = 0.5, can't see (3) = 1, blind (4) = 1 |
| 22. Rhythm of heart                        | ≥ 80bpm = 1; <80bpm = 0                                                                   |
| 23. Hand behind neck                       | Both hands (3) = 0, left hand(2) = 0.5, right hand(1) = 0.5, neither hand(4) = 1          |
| 24. Hand behind lower back                 | Both hands (3) = 0, left hand(2) = 0.5, right hand(1) = 0.5, neither hand(4) = 1          |
| 25. Able to stand up from sitting          | Yes, without using hands (1) = 0, Yes, using hands(2) = 0.5, no (3) = 1                   |
| 26. Able to pick up a book from the floor  | Yes, standing (1) = 0, Yes, sitting (2) = 0.5, no (3) = 1                                 |
| 27. Number of serious illness past 2 years | Yes = 1, no (0) = 0                                                                       |
| 28. Able to hear                           | Yes = 0, need aid = 0; despite aid = 1, no = 1                                            |
| 29. Interviewer rated health               | Surprisingly healthy = 0, relatively healthy = 0, moderately ill = 0.5, very ill = 1      |
| 30. Able to use chopsticks                 | Yes (1) = 0, no(2) = 1                                                                    |
| 31. Number of steps to turn around         | ≥ 6 steps = 1, <6 steps = 0                                                               |
| 32. Able to go out                         | Yes = 0, some difficulty = 0.5, no = 1                                                    |
| 33. Able to go shopping                    | Yes = 0, some difficulty = 0.5, no = 2                                                    |
| 34. Make food by self                      | Yes = 0, some difficulty = 0.5, no = 3                                                    |
| 35. Wash clothes by self                   | Yes = 0, some difficulty = 0.5, no = 4                                                    |
| 36. Walk 1 km                              | Yes = 0, some difficulty = 0.5, no = 5                                                    |
| 37. Carry 5kg weight                       | Yes = 0, some difficulty = 0.5, no = 6                                                    |
| 38. Crouch and stand                       | Yes = 0, some difficulty = 0.5, no = 7                                                    |
| 39. Take public transport                  | Yes = 0, some difficulty = 0.5, no = 8                                                    |

**Table S2.** MED and Frailty Levels Over Four Waves.

|                         | Wave 1 (2008) | Wave 2 (2011) | Wave 3 (2014) | Wave 4 (2018) |
|-------------------------|---------------|---------------|---------------|---------------|
| <i>Whole Sample</i>     |               |               |               |               |
| MED Consumption         | N (%)         |               |               |               |
| 0                       | 286 (12.37)   | 191 (8.26)    | 124 (5.36)    | 153 (6.62)    |
| 1                       | 745 (32.22)   | 715 (30.93)   | 670 (208.98)  | 622 (26.90)   |
| 2                       | 1085 (46.93)  | 1171 (50.65)  | 1303 (56.36)  | 1189 (51.43)  |
| 3                       | 196 (8.48)    | 235 (10.16)   | 215 (9.30)    | 348 (15.05)   |
| Frailty                 | Mean          |               |               |               |
| Frailty × 10            | 0.76          | 0.93          | 1.08          | 1.67          |
| Frailty range           | 0–0.60        | 0–0.63        | 0–0.68        | 0–0.78        |
| <i>Rural Subsample</i>  |               |               |               |               |
| MED Consumption         | N (%)         |               |               |               |
| 0                       | 241 (14.04)   | 151 (8.79)    | 101 (5.89)    | 125 (7.28)    |
| 1                       | 620 (36.11)   | 587 (34.19)   | 565 (32.91)   | 571 (30.11)   |
| 2                       | 779 (45.37)   | 885 (51.54)   | 963 (56.09)   | 872(50.78)    |
| 3                       | 77 (4.48)     | 94 (5.48)     | 88 (5.12)     | 203 (11.82)   |
| Frailty                 | Mean          |               |               |               |
| Frailty × 10            | 0.75          | 0.90          | 1.05          | 1.63          |
| Frailty range           | 0–0.60        | 0–0.63        | 0–0.65        | 0–0.78        |
| <i>Urban Subsample</i>  |               |               |               |               |
| MED Consumption         | N (%)         |               |               |               |
| 0                       | 45 (7.56)     | 40 (6.72)     | 23 (3.86)     | 28 (4.70)     |
| 1                       | 125 (21.01)   | 128 (21.51)   | 105 (17.65)   | 105 (17.65)   |
| 2                       | 306 (51.43)   | 286 (4.81)    | 340 (57.14)   | 317 (53.28)   |
| 3                       | 119 (20.00)   | 141 (23.70)   | 127 (21.34)   | 145 (24.37)   |
| Frailty                 | Mean          |               |               |               |
| Frailty × 10            | 0.78          | 1.03          | 1.21          | 1.79          |
| Frailty range           | 0–0.47        | 0–0.60        | 0–0.68        | 0–0.78        |
| <i>Male Subsample</i>   |               |               |               |               |
| MED Consumption         | N (%)         |               |               |               |
| 0                       | 101 (9.31)    | 70 (6.45)     | 39 (3.59)     | 59 (5.43)     |
| 1                       | 347 (31.98)   | 297 (27.37)   | 290 (26.73)   | 266 (24.51)   |
| 2                       | 538 (49.59)   | 603 (55.58)   | 653 (60.18)   | 582 (53.64)   |
| 3                       | 99 (9.12)     | 115 (10.60)   | 103 (9.49)    | 178 (16.40)   |
| Frailty                 | Mean          |               |               |               |
| Frailty × 10            | 0.61          | 0.76          | 0.89          | 1.42          |
| Frailty range           | 0–0.60        | 0–0.59        | 0–0.68        | 0–0.73        |
| <i>Female Subsample</i> |               |               |               |               |
| MED Consumption         | N (%)         |               |               |               |
| 0                       | 185 (15.08)   | 121 (9.86)    | 85 (6.92)     | 94 (7.66)     |
| 1                       | 398 (32.44)   | 418 (34.07)   | 380 (30.97)   | 356 (29.01)   |
| 2                       | 547 (44.58)   | 568 (46.29)   | 650 (52.97)   | 607 (49.47)   |
| 3                       | 97 (7.90)     | 120 (9.78)    | 112 (9.13)    | 170 (13.85)   |
| Frailty                 | Mean          |               |               |               |
| Frailty × 10            | 0.64          | 1.09          | 1.26          | 1.89          |
| Frailty range           | 0–0.46        | 0–0.63        | 0–0.68        | 0–0.78        |
